## **PC16 is a conserved subunit of the anaphase-promoting complex/cyclosome**

**Geert J. P. L. Kops, Monique van der Voet, Michael S. Manak, Maria H. J. van Osch, Said M. Naini, Andrea Brear, Ian X. McLeod, Dirk M. Hentschel, John R. Yates III, Sander van den Heuvel and Jagesh V. Shah**

*Journal of Cell Science* 123, 1815  
© 2010. Published by The Company of Biologists Ltd  
doi:10.1242/jcs.074104

There was an error in the first e-press version of this article published in *J. Cell Sci.* **123**, 1623-1633.

In the first e-press version of this article the first name of the second author was spelled incorrectly as Moniek.

The corresponding author apologises for this mistake.
